# Supplementary material for: Chromatin Signature Identifies Monoallelic Gene Expression Across Mammalian Cell Types
Source: Oxford University Press journal article supplement (doi:10.1534/g3.115.018853), 2015-07-01
Supplement: 018853_figures2.pdf [file 018853_figures2.pdf]

**A**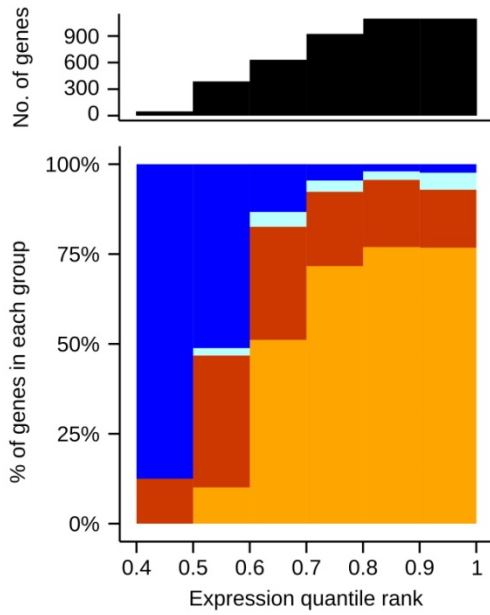**B**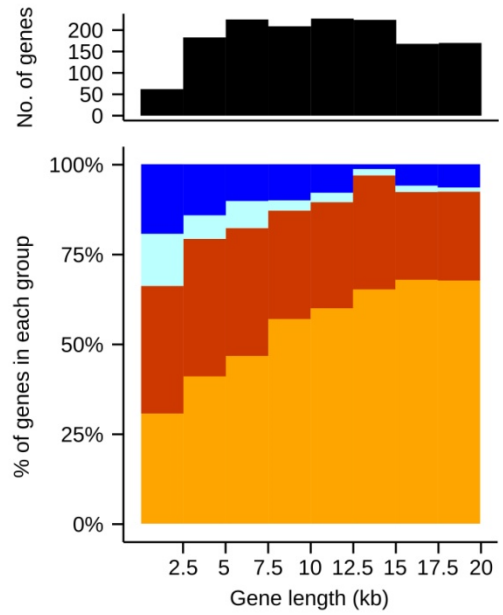**C**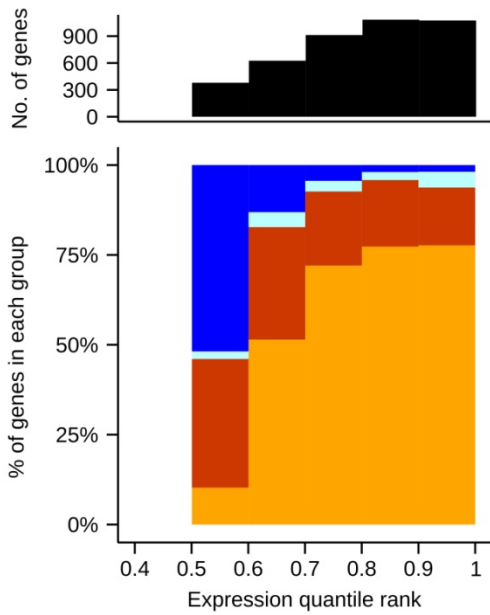**D**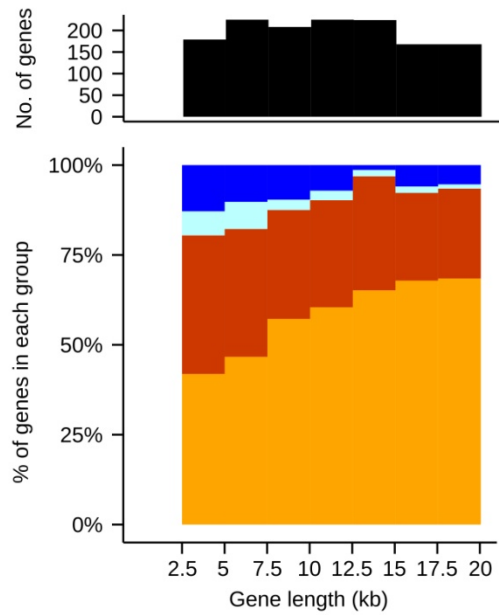

|        | MaGIC | Allelic bias |
|--------|-------|--------------|
| Blue   | MAE   | MAE          |
| Cyan   | MAE   | BAE          |
| Red    | BAE   | MAE          |
| Orange | BAE   | BAE          |

**Figure S2** Effect of gene length and expression level filtering on chromatin based MAE inference using MaGIC pipeline. ChIP-Seq, RNA abundance and allelic expression bias data are from Abl.1 clone (Tables S2, S3). (A, B) MAE status was inferred using only normalized ChIP-Seq signal, with no additional filter. (C, D) Filters for both expression level (greater than median expression) and gene length (>2.5 kb) were applied to the data in A and B. (A-D, bottom panels) Percentage of genes with consistent or inconsistent MAE/BAE classification using MaGIC and allelic bias (color code indicated on figure), plotted according to their expression rank (A, C) and gene length (B, D). (A-D, top panels) Number of genes in each bin. Note: No genes with expression rank lower than 0.4 had allelic bias calls.
